# Supplementary material for: Apelin expression deficiency in mice contributes to vascular stiffening by extracellular matrix remodeling of the aortic wall
Source: PubMed Central journal article supplement (PMC8593139; doi:10.1038/s41598-021-01735-z), 2021-11-15
Supplement: 41598_2021_1735_MOESM1_ESM.pdf [file 41598_2021_1735_MOESM1_ESM.pdf]

## Apelin expression deficiency in mice contributes to vascular stiffening by extracellular matrix remodeling of the aortic wall

Beatrice Romier, Cédric Dray, Laetitia Vanalderwiert, Amandine Wahart, Thinhinane Hocine, Alizée Dortignac, Christian Garbar, Corinne Garbar, Camille Boulagnon, Nicole Bouland, Pascal Maurice, Amar Bennisroune, Hervé Sartelet, Laurent Martiny, Laurent Duca, Philippe Valet, Sébastien Blaise

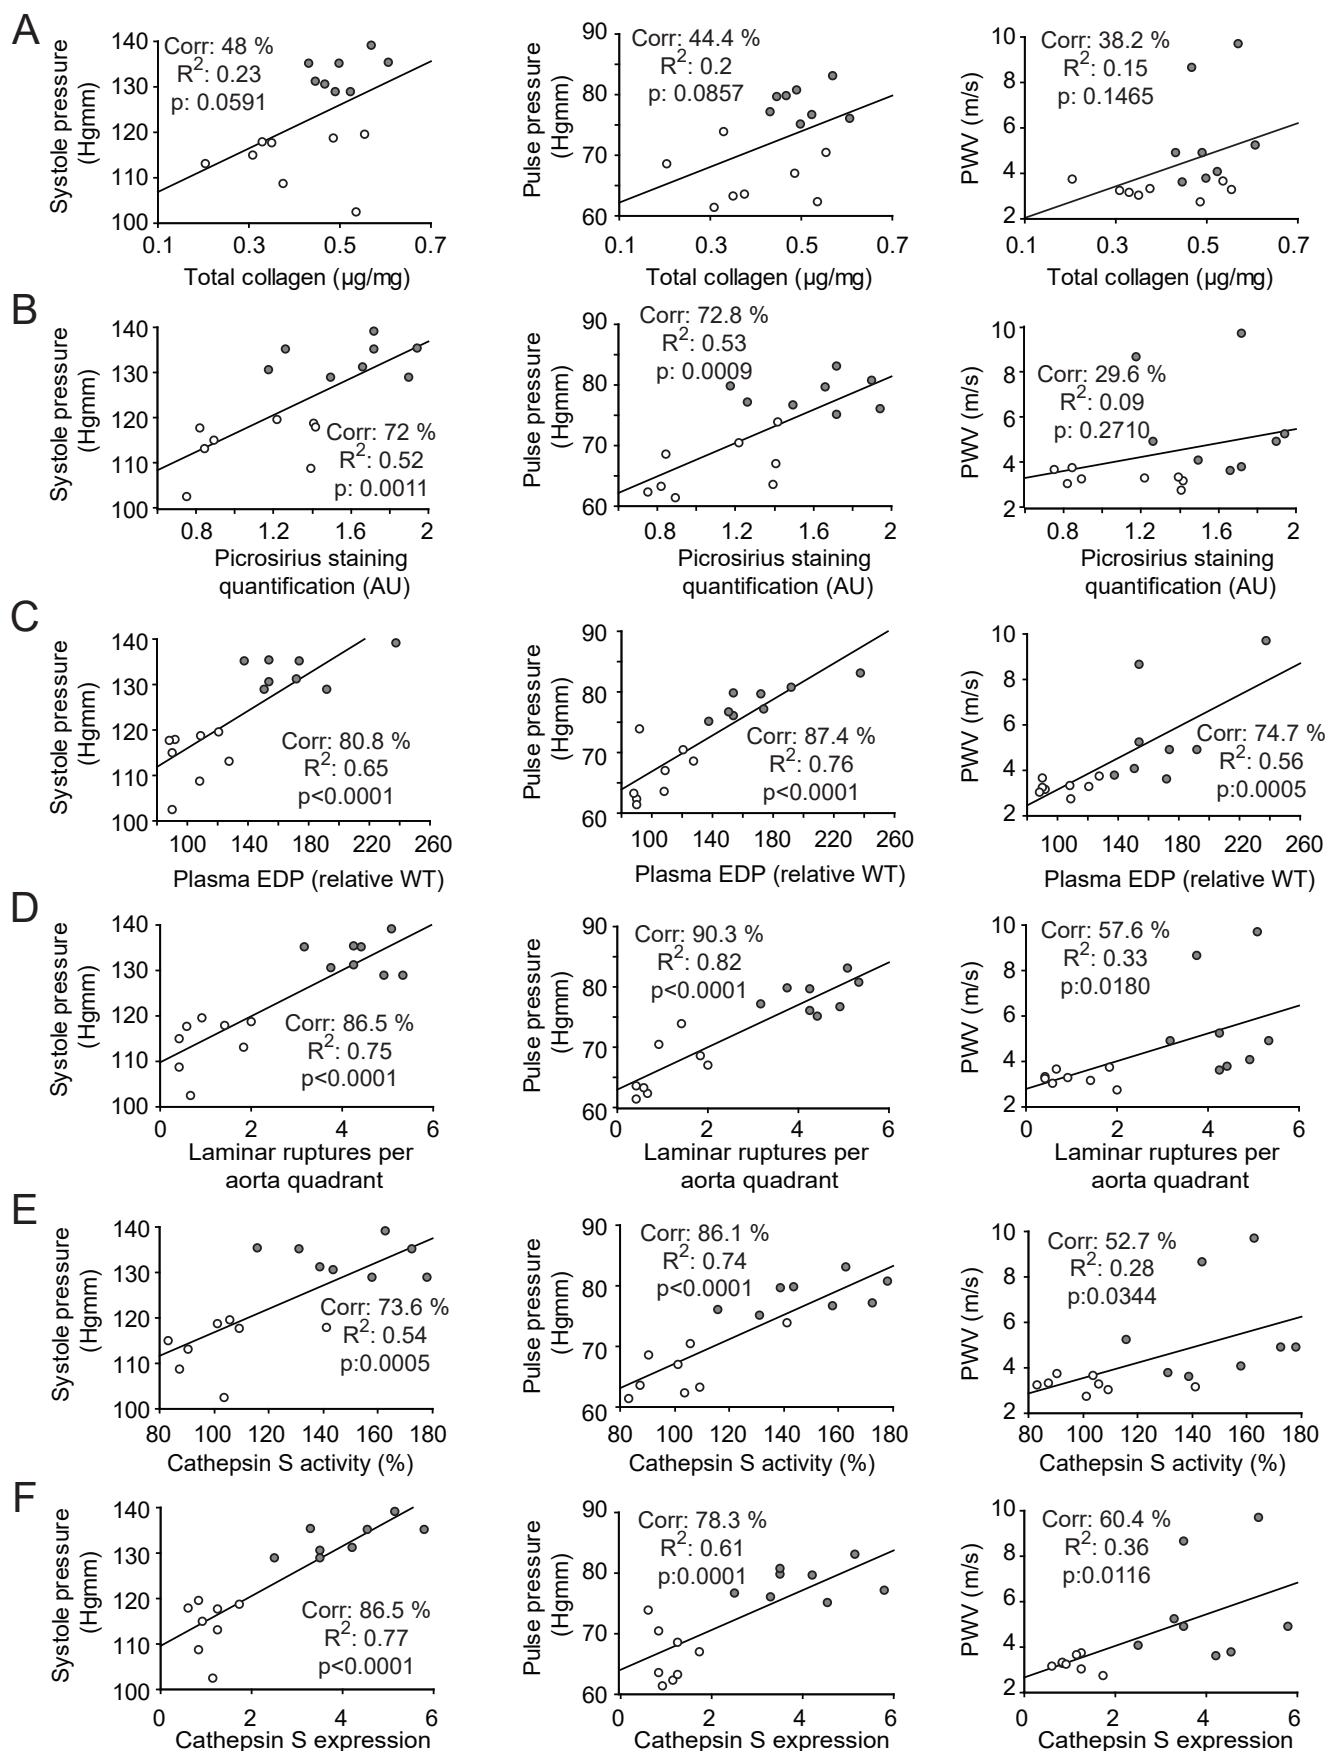

**Supplementary data 1, Univariate correlation test (test-Z):** (A-B) Association of systolic and pulse pressures and pulse wave velocity, PWV (obtained in figure 2) with total collagen assay (panel A), picosirius staining (panel B) obtained figure 3. (C-D) Association of systolic and pulse pressures and pulse wave velocity, PWV with plasma EDP assay (panel C), Lamina ruptures per aorta quadrant (panel D) determined in figure 4. (E-F) Association of systolic and pulse pressures and pulse wave velocity, PWV with cathepsin S activity (panel E) and cathepsin S expression (panel F) determined in figure 5.
